# Supplementary material for: Aberrant miRNA-mRNA regulatory network in polycystic ovary syndrome is associated with markers of insulin sensitivity and inflammation
Source: PubMed Central journal article supplement — Ann Transl Med. 2021 Sep;9(18):1405. doi: 10.21037/atm-21-1288 (PMC8506717; doi:10.21037/atm-21-1288), 2021-09
Supplement: atm-09-18-1405-dss.pdf [file atm-09-18-1405-dss.pdf]

| Data Sharing Statement |                                                                                                                                                        |                                                              |
|------------------------|--------------------------------------------------------------------------------------------------------------------------------------------------------|--------------------------------------------------------------|
| Article Info           | <a href="https://dx.doi.org/10.21037/atm-21-1288">https://dx.doi.org/10.21037/atm-21-1288</a>                                                          |                                                              |
| Item                   | Question                                                                                                                                               | Authors' Response<br>(place "-" if not applicable)           |
| 1                      | Would you like to share data collected for your study to others?                                                                                       | yes                                                          |
| 2                      | If not, would you like to share the reason for your decision?                                                                                          | -                                                            |
| 3                      | What data in particular will be shared?                                                                                                                | The miRNA-seq and RNA-seq data in particular will be shared. |
| 4                      | Any other documents will be shared?<br>Such as study protocol, statistical analysis plan, informed consent form, clinical study report, analytic code. | -                                                            |
| 5                      | When will data availability begin?                                                                                                                     | From the publication date.                                   |
| 6                      | When will data availability end?                                                                                                                       | -                                                            |
| 7                      | To whom will you share the data?                                                                                                                       | Researchers who are interested in studies of PCOS and NGS.   |
| 8                      | For what type of analysis or purpose?                                                                                                                  | Meta analysis or other integrated analysis                   |

|    |                                                  |                                                                                                                                                                                                                                                                                           |
|----|--------------------------------------------------|-------------------------------------------------------------------------------------------------------------------------------------------------------------------------------------------------------------------------------------------------------------------------------------------|
| 9  | How or where can the data/documents be obtained? | <a href="https://www.ncbi.nlm.nih.gov/geo/query/acc.cgi?acc=GSE15696">https://www.ncbi.nlm.nih.gov/geo/query/acc.cgi?acc=GSE15696</a><br>and<br><a href="https://www.ncbi.nlm.nih.gov/geo/query/acc.cgi?acc=GSE168166">https://www.ncbi.nlm.nih.gov/geo/query/acc.cgi?acc=GSE168166</a> . |
| 10 | Any other restrictions?                          | We may balance the potential benefits and risks for each request and then provide the data that could be shared.                                                                                                                                                                          |
