# Supplementary material for: Aberrant miRNA-mRNA regulatory network in polycystic ovary syndrome is associated with markers of insulin sensitivity and inflammation
Source: PubMed Central journal article supplement — Ann Transl Med. 2021 Sep;9(18):1405. doi: 10.21037/atm-21-1288 (PMC8506717; doi:10.21037/atm-21-1288), 2021-09
Supplement: atm-09-18-1405-supplementary.pdf [file atm-09-18-1405-supplementary.pdf]

Table S1 Primer sequences of RT-qPCR

| Primer             | Sequence 5'→3'                                         |
|--------------------|--------------------------------------------------------|
| Gene               |                                                        |
| Stat3 F            | ATCTTTGGGCAATCTGGGCA                                   |
| Stat3 R            | CTTCTGCTCTCAGCCCCATC                                   |
| Cd28 F             | TTCTCAGTTCAAGTAACAGAAAACA                              |
| Cd28 R             | AGGCTGACCTCGTTGCTATC                                   |
| Gsk3b F            | AGGAAGGAAAAGGTGATTCAAGA                                |
| Gsk3b R            | TGCTGCCATCTTTATCTCTGCT                                 |
| Nr1h3 F            | CAGTAGGAAGGACCCCTTGG                                   |
| Nr1h3 R            | AAGAACTGTCCTGGCCTT                                     |
| Il18 F             | TACAAGCATCCAGGCACAGC                                   |
| Il18 R             | CTGATGCTGGAGGTTGCAGA                                   |
| Il10rb F           | CTTCTGGTGCCAGCTCTAGG                                   |
| Il10rb R           | TCGTTTTGGGAAAGCAGGT                                    |
| Socs3 F            | ACGGCTGCCAACATCTGG                                     |
| Socs3 R            | GCATCCCGGGGAGCTAGT                                     |
| Gapgh F            | AGGTTGTCTCCTGCGACTTCA                                  |
| Gapgh R            | TACCCATAAACCCACCAC                                     |
| STAT1 F            | TCTGCCGGAGAAACAGTTGG                                   |
| STAT1 R            | AGGTACCGTGTGTCAAGCTG                                   |
| MAPK14 F           | TTATGCGTCTGACAGGAACACC                                 |
| MAPK14 R           | AGTCGACAGCCAGGGGATTG                                   |
| RUNX1 F            | GGTTTCGACGCGTGGTAAAA                                   |
| RUNX1 R            | GCACTGTGGGTACGAAGGAA                                   |
| CSF1R F            | TGCGGCCAGGCTAAAAGGG                                    |
| CSF1R R            | GGCTGTTTGTCTTGTTCCTCTT                                 |
| FOS F              | GGGGCAAGGTGGAACAGTTA                                   |
| FOS R              | AGTTGGTCTGTCTCCGCTTG                                   |
| SPI1 F             | TCCTGAGGGGCTCTGCATTG                                   |
| SPI1 R             | AGGTCTTCTGATGGCTGAGGG                                  |
| IL18 F             | AAGATGGCTGCTGAACCAGT                                   |
| IL18 R             | TCTGATTCCAGGTTTTCATCATCT                               |
| IL10R F            | AAGTGGCGCTCCTGAGGTAT                                   |
| IL10R R            | GGTCACTGCGGTAAGGTCAT                                   |
| SOCS3 F            | GCTCCTTTGTGGACTTCACG                                   |
| SOCS3 R            | CCCGAATCGAAGTCTCCGTC                                   |
| ACTB F             | GGACTTCGAGCAAGAGATGG                                   |
| ACTB R             | AGCACTGTGTTGGCGTACAG                                   |
| miRNA              |                                                        |
| mmu-miR-106a-5p F  | CGCCGAGCAAAGTGCTAACA                                   |
| mmu-miR-106a-5p RT | GTCGTATCCAGTGCGTGTCTGGAGTCGGCAATTGCACTGGATACGACCTACCT  |
| mmu-miR-155-5p F   | CGCCGAGTTAATGCTAATTG                                   |
| mmu-miR-155-5p RT  | GTCGTATCCAGTGCGTGTCTGGAGTCGGCAATTGCACTGGATACGACACCCCT  |
| hsa-miR-106a-5p F  | CGCCGAGAAAAGTGCTAACA                                   |
| hsa-miR-106a-5p RT | GTCGTATCCAGTGCGTGTCTGGAGTCGGCAATTGCACTGGATACGACCTACCT  |
| hsa-miR-155-5p F   | CGCCGAGTTAATGCTAATTG                                   |
| hsa-miR-155-5p RT  | GTCGTATCCAGTGCGTGTCTGGAGTCGGCAATTGCACTGGATACGACAACCCCT |
| U6 F               | CTCGCTTCGGCAGCACA                                      |
| U6 RT              | AACGCTTCACGAATTTGCGT                                   |
| Universal R        | CAGTGCGTGTCTGGAGT                                      |

**Table S2** Sequencing data information of RNA-seq in PNA mice compared with the control mice

| Sample | Total clean reads | Mapped reads | Mapped ratio | Unique mapped reads | Unique mapped ratio |
|--------|-------------------|--------------|--------------|---------------------|---------------------|
| P1     | 23501545          | 16529681     | 70.34%       | 15490986            | 65.91%              |
| P2     | 31747833          | 21611959     | 68.07%       | 20310150            | 63.97%              |
| P4     | 23361862          | 15079981     | 64.55%       | 14271278            | 61.09%              |
| P-mean | 26203747          | 17740540     | 67.65%       | 16690804.67         | 63.66%              |
| C1     | 30726196          | 21023286     | 68.42%       | 19933938            | 64.88%              |
| C4     | 18373080          | 13016258     | 70.84%       | 12263718            | 66.75%              |
| C-mean | 24549638          | 17019772     | 69.63%       | 16098828            | 65.82%              |

PNA, prenatally androgenized.

**Table S3** Sequencing data information of miRNA-seq in PNA mice compared with the control mice

| Sample | Total clean reads | Mapping ratio of mature miRNA |              |                     |                     |
|--------|-------------------|-------------------------------|--------------|---------------------|---------------------|
|        |                   | Mapped reads                  | Mapped ratio | Unique mapped reads | Unique mapped ratio |
| P1     | 15504772          | 6573625                       | 42.39%       | 2467580             | 15.91%              |
| P2     | 17271763          | 6851502                       | 39.66%       | 2503535             | 14.49%              |
| P3     | 10049532          | 4886138                       | 48.62%       | 1545411             | 15.38%              |
| P4     | 14250703          | 8664866                       | 60.80%       | 3758167             | 26.37%              |
| P-mean | 14269193          | 6744033                       | 47.66%       | 2568673             | 20.54%              |
| C2     | 10273792          | 5176801                       | 50.38%       | 2617114             | 25.47%              |
| C3     | 13697931          | 5313779                       | 38.79%       | 2110534             | 15.41%              |
| C6     | 7447955           | 5069099                       | 26.13%       | 654476              | 8.45%               |
| C-mean | 11422218          | 5575928                       | 38.43%       | 1987699             | 16.44%              |

PNA, prenatally androgenized.

**Table S4** Differentially expressed miRNAs in PNA mice compared with the control mice

| miRNA            | logFC        | logCPM      | LR          | P value     | FDR         |
|------------------|--------------|-------------|-------------|-------------|-------------|
| mmu-miR-5100     | -5.365445964 | 0.262207305 | 15.62876477 | 0.000077073 | 0.017880982 |
| mmu-miR-184-3p   | -2.163505579 | 3.971215579 | 10.10915882 | 0.001475343 | 0.228186364 |
| mmu-miR-486a-5p  | 1.487138295  | 5.483623665 | 8.287379125 | 0.003992157 | 0.37344364  |
| mmu-miR-486b-3p  | 1.487142721  | 5.483623665 | 8.272873274 | 0.004024177 | 0.37344364  |
| mmu-miR-5121     | -1.791298309 | 2.75279053  | 7.941968578 | 0.004830126 | 0.373529757 |
| mmu-miR-451a     | 1.422733915  | 7.510176789 | 7.584771944 | 0.005886341 | 0.390180319 |
| mmu-miR-130a-3p  | -1.353736584 | 9.231294641 | 7.053284482 | 0.007912004 | 0.440400025 |
| mmu-miR-677-5p   | -1.63828883  | 3.677321457 | 6.857573796 | 0.008826632 | 0.440400025 |
| mmu-miR-127-3p   | 1.198140538  | 11.55112459 | 6.727946668 | 0.00949138  | 0.440400025 |
| mmu-miR-155-5p   | -1.148743107 | 4.171982512 | 5.962855006 | 0.014610364 | 0.508828416 |
| mmu-miR-106a-5p  | -1.714259453 | 0.932564361 | 5.917072117 | 0.014994856 | 0.508828416 |
| mmu-miR-3068-3p  | -1.119567509 | 4.824476871 | 5.875549382 | 0.015352582 | 0.508828416 |
| mmu-miR-425-3p   | -1.677175406 | 3.286612848 | 5.736437283 | 0.016616464 | 0.513128298 |
| mmu-miR-467d-5p  | 1.616936293  | 1.23981623  | 5.626187002 | 0.017694079 | 0.513128298 |
| mmu-miR-128-1-5p | 1.040296733  | 3.191899368 | 4.643657264 | 0.031168512 | 0.850717024 |
| mmu-miR-431-5p   | 1.401225373  | 4.337566127 | 4.307541032 | 0.03794377  | 0.880295469 |

PNA, prenatally androgenized.
